# Supplementary material for: Three-phase junction for modulating electron–hole migration in anatase–rutile photocatalysts
Source: Royal Society of Chemistry journal article supplement (doi:10.1039/c5sc00621j), 2015-01-01
Supplement: c5sc00621j1.pdf [file c5sc00621j1.pdf]

# Three-phase Junction for Modulating Electron-Hole Migration in Anatase/Rutile Photocatalysts

Wei-Na Zhao, Sheng-Cai Zhu, Ye-Fei Li, Zhi-Pan Liu\*

Collaborative Innovation Center of Chemistry for Energy Material, Shanghai Key Laboratory of Molecular Catalysis and Innovative Materials, Key Laboratory of Computational Physical Science (Ministry of Education), Department of Chemistry, Fudan University, Shanghai 200433, China

\*email: zpliu@fudan.edu.cn

## Structure of pure phases

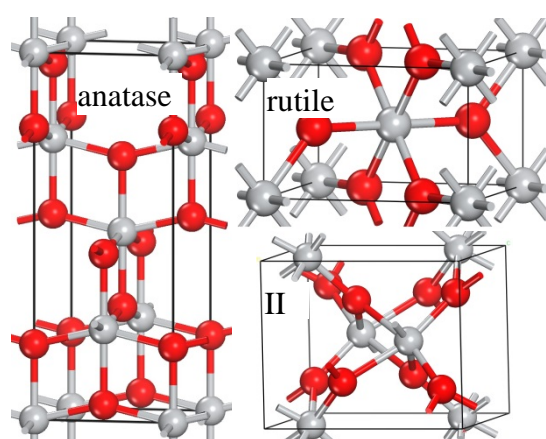

**Figure S1** DFT optimized bulk structure for anatase, rutile and TiO<sub>2</sub>-II. Ti: Grey; O: Red.

**Table S1.** Other models for anatase-rutile phase junction and the computed strain energy. The phase junction is constructed by joining two phases (P1 and P2) according to the OR.

| OR             | P1           |              | P2           |              | <i>S</i> |
|----------------|--------------|--------------|--------------|--------------|----------|
|                | <i>a</i> (Å) | <i>b</i> (Å) | <i>a</i> (Å) | <i>b</i> (Å) |          |
| Direct Model   |              |              |              |              |          |
| <b>I</b>       | 9.68         | 3.81         | 4.65         | 2.97         | 5.98     |
| <b>II</b>      | 6.57         | 2.97         | 5.54         | 3.81         | 2.36     |
| <b>III</b>     | 5.54         | 3.81         | 4.65         | 2.97         | 3.07     |
| <b>IV</b>      | 7.21         | 7.21         | 7.62         | 7.62         | 2.30     |
| Indirect Model |              |              |              |              |          |
| <b>V</b>       | 5.38         | 5.54         | 4.60         | 4.95         | 2.63     |
| <b>VI</b>      | 7.24         | 6.76         | 5.38         | 5.54         | 3.30     |

\* The OR include a pair of parallel crystallography planes  $(hkl)_{P1} // (hkl)_{P2}$  that attach with each other (with lattice parameter *a* and *b*) and a pair of parallel directions  $[uvw]_{P1} // [uvw]_{P2}$ . Here OR are follows. **I**:  $(100)_A // (100)_R$ ,  $[001]_A // [001]_R$ ; **II**:  $(110)_R // (101)_A$ ,  $[1-10]_R // [010]_A$ ; **III**:  $(101)_A // (100)_R$ ,  $[010]_A // [001]_R$ ; **IV**:  $(101)_R // (001)_A$ ,  $[11-1]_R // [100]_A$ ; **V**:  $(112)_A // (010)_{II}$ ,  $[1-10]_A // [001]_{II}$ ; **VI**:  $(111)_{II} // (112)_A$ ;  $[1-10]_{II} // [1-10]_A$ .

## The DFT optimized coordinates of structures

### (1) anatase (car format file)

```

!BIOSYM archive 3
PBC=ON
CAR File
!DATE
PBC 3.8076 3.8076 9.6754 90.0000 90.0000 90.0000 (P1)
Ti1 0.00000000 0.00000000 0.00000000 XXXX 1 xx Ti 0.000
Ti2 1.903778919 1.903778919 4.837690490 XXXX 1 xx Ti 0.000
Ti3 0.000000000 1.903778919 2.418845245 XXXX 1 xx Ti 0.000
Ti4 1.903778919 0.000000000 7.256535735 XXXX 1 xx Ti 0.000
O1 0.000000000 0.000000000 2.005760906 XXXX 1 xx O 0.000
O2 1.903778919 1.903778919 6.843451396 XXXX 1 xx O 0.000
O3 0.000000000 1.903778919 4.424606151 XXXX 1 xx O 0.000
O4 1.903778919 0.000000000 9.262296642 XXXX 1 xx O 0.000
O5 1.903778919 0.000000000 5.250774829 XXXX 1 xx O 0.000
O6 0.000000000 1.903778919 0.413084339 XXXX 1 xx O 0.000
O7 1.903778919 1.903778919 2.831929584 XXXX 1 xx O 0.000
O8 0.000000000 0.000000000 7.669620074 XXXX 1 xx O 0.000
end
end

```

### (2) rutile (car format file)

```

!BIOSYM archive 3
PBC=ON
CAR File
!DATE

```

```

PBC 4.6474 4.6474 2.9667 90.0000 90.0000 90.0000 (P1)
Ti1 0.000000000 0.000000000 0.000000000 XXXX 1 xx Ti 0.000
Ti2 2.323719461 2.323719461 1.483358865 XXXX 1 xx Ti 0.000
O1 1.418163368 1.418163368 0.000000000 XXXX 1 xx O 0.000
O2 3.229275553 3.229275553 0.000000000 XXXX 1 xx O 0.000
O3 0.905556093 3.741882829 1.483358865 XXXX 1 xx O 0.000
O4 3.741882829 0.905556093 1.483358865 XXXX 1 xx O 0.000
end
end

```

### (3) TiO<sub>2</sub>-II (car format file)

```

!BIOSYM archive 3
PBC=ON
CAR File
!DATE
PBC 4.5898 5.5988 4.9341 90.0000 90.0000 90.0000 (P1)
O 1.049250686 4.925464587 2.865924622 CORE 1 O O 0.000
O 1.245658168 3.472799963 0.398898403 CORE 2 O O 0.000
O 3.540567086 4.925464595 4.535154034 CORE 3 O O 0.000
O 3.344159601 3.472799970 2.068127815 CORE 4 O O 0.000
O 3.540567109 0.673378458 2.068127815 CORE 5 O O 0.000
O 3.344159627 2.126043083 4.535154034 CORE 6 O O 0.000
O 1.049250708 0.673378451 0.398898403 CORE 7 O O 0.000
O 1.245658194 2.126043075 2.865924622 CORE 8 O O 0.000
Ti -0.000000033 4.600978034 1.233513109 CORE 9 Ti Ti 0.000
Ti 2.294908896 3.797286524 3.700539328 CORE 10 Ti Ti 0.000
Ti 0.000000012 0.997865012 3.700539328 CORE 11 Ti Ti 0.000
Ti 2.294908899 1.801556522 1.233513109 CORE 12 Ti Ti 0.000
end
end

```

### (4) 3R/4II structure (car format file)

```

!BIOSYM archive 3
PBC=ON
CAR File
!DATE
PBC 4.6088 5.5723 17.4876 92.4848 90.0057 90.0170 (P1)
O 2.509544583 0.519353315 5.297063301 CORE 1 O O 0.000
O 2.427688756 0.356233038 10.303376121 CORE 2 O O 0.000
O 2.399604422 3.607340951 15.348495654 CORE 3 O O 0.000
O 2.714973017 4.548712281 7.755295104 CORE 4 O O 0.000
O 2.378766871 1.946181354 12.841945021 CORE 5 O O 0.000
O 0.411616451 0.491349540 6.977490356 CORE 6 O O 0.000
O 0.101776086 0.652973282 11.902743336 CORE 7 O O 0.000
O 0.126787126 3.903639574 16.948157953 CORE 8 O O 0.000
O 0.182892787 4.561724402 9.411720910 CORE 9 O O 0.000
O 0.083737925 2.298671893 14.411250546 CORE 10 O O 0.000
O 0.449079875 1.774160572 9.426680451 CORE 11 O O 0.000
O 0.538205709 -0.485814933 14.419435367 CORE 12 O O 0.000
O 0.231147875 3.277695901 6.964214132 CORE 13 O O 0.000
O 0.536326084 3.438398397 11.888688446 CORE 14 O O 0.000
O 0.507341349 1.117534532 16.961410991 CORE 15 O O 0.000
O 2.531203986 1.760882196 7.766654292 CORE 16 O O 0.000
O 2.847329997 4.731170803 12.827719137 CORE 17 O O 0.000
O 2.729500758 3.303815019 5.285710344 CORE 18 O O 0.000
O 2.813923500 3.141474821 10.287457905 CORE 19 O O 0.000
O 2.836691401 0.818421417 15.361453867 CORE 20 O O 0.000
O 2.480906443 0.474925822 0.356752941 CORE 21 O O 0.000
O 2.725928719 4.639524563 2.809648554 CORE 22 O O 0.000
O 0.414709485 0.544472191 2.018169219 CORE 23 O O 0.000
O 0.212897414 4.627319151 4.493068269 CORE 24 O O 0.000
O 0.423421281 1.840935883 4.504915935 CORE 25 O O 0.000
O 0.233917466 3.328326929 2.006579167 CORE 26 O O 0.000
O 2.524317069 1.852058986 2.826694978 CORE 27 O O 0.000
O 2.757210036 3.259761858 0.349170029 CORE 28 O O 0.000
Ti 1.462261823 0.099112626 8.595219260 CORE 29 Ti Ti 0.000
Ti 1.447743524 3.434536936 13.634493225 CORE 30 Ti Ti 0.000
Ti 3.757780258 4.950279970 6.128555174 CORE 31 Ti Ti 0.000
Ti 3.778733723 4.586809531 11.097483653 CORE 32 Ti Ti 0.000
Ti 3.772145466 2.287345123 16.156445930 CORE 33 Ti Ti 0.000
Ti 1.483952689 2.160546417 6.135419977 CORE 34 Ti Ti 0.000
Ti 1.461977190 1.807519098 11.110933132 CORE 35 Ti Ti 0.000

```

|    |             |              |              |         |    |    |       |
|----|-------------|--------------|--------------|---------|----|----|-------|
| Ti | 1.465252847 | -0.488026298 | 16.155726752 | CORE 36 | Ti | Ti | 0.000 |
| Ti | 3.790702509 | 2.880835598  | 8.584757576  | CORE 37 | Ti | Ti | 0.000 |
| Ti | 3.775002519 | 0.644658454  | 13.620204978 | CORE 38 | Ti | Ti | 0.000 |
| Ti | 1.467778086 | 0.194035038  | 3.654191885  | CORE 39 | Ti | Ti | 0.000 |
| Ti | 3.772298045 | 4.960076579  | 1.167437056  | CORE 40 | Ti | Ti | 0.000 |
| Ti | 1.471761753 | 2.169801439  | 1.184107207  | CORE 41 | Ti | Ti | 0.000 |
| Ti | 3.782714803 | 2.979976628  | 3.649400675  | CORE 42 | Ti | Ti | 0.000 |

end  
end

(5) 4A/4II structure (car format file)

```

!BIOSYM archive 3
PBC=ON
CAR File
!DATE
PBC 5.5407 5.1349 18.7819 91.0589 89.9726 90.0112 (P1)
O 0.072282787 1.208198219 5.883657967 CORE 1 O O 0.000
O 2.717858032 2.349735345 8.247617278 CORE 2 O O 0.000
O 1.333234497 3.196694112 10.539569351 CORE 3 O O 0.000
O 2.759977514 2.350543475 12.797880720 CORE 4 O O 0.000
O 5.511892937 0.595759304 15.052012177 CORE 5 O O 0.000
O 2.852737295 2.432943224 17.360396374 CORE 6 O O 0.000
O 1.364947664 4.945629325 8.489721112 CORE 7 O O 0.000
O 4.117392432 -0.219238845 12.793269582 CORE 8 O O 0.000
O 1.363357149 3.163048302 15.050695493 CORE 9 O O 0.000
O 4.033542327 -0.133864093 17.358275031 CORE 10 O O 0.000
O 1.272286871 3.774969667 5.876985996 CORE 11 O O 0.000
O 4.157431757 4.914300376 8.246715054 CORE 12 O O 0.000
O 4.105351770 3.182228046 10.744906106 CORE 13 O O 0.000
O 1.343817316 -0.225703576 13.002469427 CORE 14 O O 0.000
O 4.154910901 3.199257320 15.292009966 CORE 15 O O 0.000
O 1.293927120 1.966723648 3.792695901 CORE 16 O O 0.000
O 4.025871903 3.122719846 6.184287508 CORE 17 O O 0.000
O 5.508699730 2.378011276 8.494147257 CORE 18 O O 0.000
O 2.858882936 0.558747561 6.186592864 CORE 19 O O 0.000
O 5.541268206 0.629264296 10.544868381 CORE 20 O O 0.000
O 2.769607227 0.616744921 10.746517227 CORE 21 O O 0.000
O 5.528439165 2.342697084 13.005523253 CORE 22 O O 0.000
O 0.045414077 4.534983354 3.792547751 CORE 23 O O 0.000
O 2.720672401 0.632808868 15.293340514 CORE 24 O O 0.000
O 2.811449485 0.017366747 3.409882559 CORE 25 O O 0.000
O 4.075224074 2.582268203 3.405396767 CORE 26 O O 0.000
O 4.062752497 0.789345597 1.350845179 CORE 27 O O 0.000
O 2.802986756 3.353107954 1.355594489 CORE 28 O O 0.000
O 0.036727348 3.966357314 0.981847143 CORE 29 O O 0.000
O 1.287674448 1.396791292 0.981090935 CORE 30 O O 0.000
O 1.270421366 4.357262983 17.657903894 CORE 31 O O 0.000
O 0.072117184 1.793585375 17.662138779 CORE 32 O O 0.000
Ti 5.317627515 2.880169871 4.828979882 CORE 33 Ti Ti 0.000
Ti 2.528508538 4.031593061 7.265932138 CORE 34 Ti Ti 0.000
Ti 5.273951058 4.008438538 9.519072135 CORE 35 Ti Ti 0.000
Ti 2.492251035 4.037426049 11.780943228 CORE 36 Ti Ti 0.000
Ti 1.583350465 1.515405199 14.033837990 CORE 37 Ti Ti 0.000
Ti 2.528004215 4.085018917 16.282965562 CORE 38 Ti Ti 0.000
Ti 1.565224671 0.315420629 4.832699585 CORE 39 Ti Ti 0.000
Ti 4.349639176 1.465466925 7.256627001 CORE 40 Ti Ti 0.000
Ti 1.596179991 1.444347222 9.525357759 CORE 41 Ti Ti 0.000
Ti 4.387881644 1.471188936 11.780215301 CORE 42 Ti Ti 0.000
Ti 5.287616733 4.085030335 14.033096259 CORE 43 Ti Ti 0.000
Ti 4.352112320 1.514332071 16.300619073 CORE 44 Ti Ti 0.000
Ti 2.552677837 1.688601848 2.382814010 CORE 45 Ti Ti 0.000
Ti 4.315797494 4.252818978 2.397128810 CORE 46 Ti Ti 0.000
Ti 5.320190337 0.132520488 18.737317258 CORE 47 Ti Ti 0.000
Ti 1.560669882 2.704372315 18.724845883 CORE 48 Ti Ti 0.000
end
end

```

(6) 8A/3R structure (car format file)

```

!BIOSYM archive 3
PBC=ON
CAR File

```

| !DATE | 5.2288      | 5.5971       | 26.9288      | 91.8170 | 90.1065 | 90.5239 (P1) |       |  |  |
|-------|-------------|--------------|--------------|---------|---------|--------------|-------|--|--|
| PBC   | 0.756979989 | 0.020705992  | 19.933186489 | CORE 1  | O       | O            | 0.000 |  |  |
| O     | 0.718436077 | 3.085197728  | 15.087155226 | CORE 2  | O       | O            | 0.000 |  |  |
| O     | 3.342677083 | 4.366242580  | 17.518855271 | CORE 3  | O       | O            | 0.000 |  |  |
| O     | 3.342272261 | 1.221407786  | 22.392266903 | CORE 4  | O       | O            | 0.000 |  |  |
| O     | 0.614756974 | 2.265805253  | 24.712951390 | CORE 5  | O       | O            | 0.000 |  |  |
| O     | 4.793804924 | 2.823195072  | 19.946647081 | CORE 6  | O       | O            | 0.000 |  |  |
| O     | 2.165471090 | 4.033928259  | 22.406381774 | CORE 7  | O       | O            | 0.000 |  |  |
| O     | 4.762459597 | 0.294075719  | 15.116822167 | CORE 8  | O       | O            | 0.000 |  |  |
| O     | 2.166424430 | 1.579271876  | 17.537328738 | CORE 9  | O       | O            | 0.000 |  |  |
| O     | 4.980749806 | -0.520439308 | 24.691448095 | CORE 10 | O       | O            | 0.000 |  |  |
| O     | 2.181064939 | 3.683410088  | 19.565663380 | CORE 11 | O       | O            | 0.000 |  |  |
| O     | 4.817738188 | -0.688121990 | 21.950195909 | CORE 12 | O       | O            | 0.000 |  |  |
| O     | 2.391764295 | 0.583654740  | 24.551084275 | CORE 13 | O       | O            | 0.000 |  |  |
| O     | 4.823323310 | 1.560891868  | 26.747371847 | CORE 14 | O       | O            | 0.000 |  |  |
| O     | 4.777127687 | 2.397704726  | 17.133817292 | CORE 15 | O       | O            | 0.000 |  |  |
| O     | 3.363787076 | 0.871716022  | 19.550197630 | CORE 16 | O       | O            | 0.000 |  |  |
| O     | 0.734850413 | 2.102669390  | 21.957423726 | CORE 17 | O       | O            | 0.000 |  |  |
| O     | 3.183060350 | 3.372739459  | 24.497616065 | CORE 18 | O       | O            | 0.000 |  |  |
| O     | 0.779958751 | -0.409860249 | 17.111607087 | CORE 19 | O       | O            | 0.000 |  |  |
| O     | 0.602857743 | 4.380708934  | 26.779287628 | CORE 20 | O       | O            | 0.000 |  |  |
| O     | 3.417114981 | 4.269878344  | 0.461060766  | CORE 21 | O       | O            | 0.000 |  |  |
| O     | 4.981105425 | 1.082142258  | 2.222913724  | CORE 22 | O       | O            | 0.000 |  |  |
| O     | 0.335289729 | 3.879492526  | 2.220430914  | CORE 23 | O       | O            | 0.000 |  |  |
| O     | 2.100057418 | 1.512606474  | 0.589269473  | CORE 24 | O       | O            | 0.000 |  |  |
| O     | 3.349383779 | 1.814464500  | 12.719358933 | CORE 25 | O       | O            | 0.000 |  |  |
| O     | 2.025932615 | 4.620646338  | 12.738179411 | CORE 26 | O       | O            | 0.000 |  |  |
| O     | 2.140120720 | 1.107676866  | 14.720082186 | CORE 27 | O       | O            | 0.000 |  |  |
| O     | 3.335361040 | 3.896348725  | 14.690549419 | CORE 28 | O       | O            | 0.000 |  |  |
| O     | 0.467144198 | 0.437794862  | 10.110085598 | CORE 29 | O       | O            | 0.000 |  |  |
| O     | 3.050622472 | 5.047969005  | 7.911808728  | CORE 30 | O       | O            | 0.000 |  |  |
| O     | 4.809712917 | 3.255044511  | 10.150044490 | CORE 31 | O       | O            | 0.000 |  |  |
| O     | 2.171691259 | 2.260058097  | 7.929550303  | CORE 32 | O       | O            | 0.000 |  |  |
| O     | 2.182557796 | 4.293464794  | 10.010230938 | CORE 33 | O       | O            | 0.000 |  |  |
| O     | 4.705092352 | -0.189065250 | 12.256977821 | CORE 34 | O       | O            | 0.000 |  |  |
| O     | 3.099585276 | 1.486028908  | 9.994084328  | CORE 35 | O       | O            | 0.000 |  |  |
| O     | 0.708043501 | 2.591508336  | 12.218893043 | CORE 36 | O       | O            | 0.000 |  |  |
| O     | 3.001692132 | 2.584355309  | 3.147702657  | CORE 37 | O       | O            | 0.000 |  |  |
| O     | 5.019929971 | 4.995061617  | 4.638569603  | CORE 38 | O       | O            | 0.000 |  |  |
| O     | 0.255828244 | 2.222507761  | 4.632420641  | CORE 39 | O       | O            | 0.000 |  |  |
| O     | 2.302020475 | 5.389752717  | 3.164376855  | CORE 40 | O       | O            | 0.000 |  |  |
| O     | 4.785088750 | 3.408553080  | 7.231916643  | CORE 41 | O       | O            | 0.000 |  |  |
| O     | 0.483562412 | 0.604918212  | 7.208492119  | CORE 42 | O       | O            | 0.000 |  |  |
| O     | 2.039269154 | 3.698609668  | 5.643028497  | CORE 43 | O       | O            | 0.000 |  |  |
| O     | 3.261194998 | 0.899071753  | 5.623350020  | CORE 44 | O       | O            | 0.000 |  |  |
| Ti    | 3.484141450 | 2.637828823  | 18.575383403 | CORE 45 | Ti      | Ti           | 0.000 |  |  |
| Ti    | 0.875163064 | 3.870245989  | 20.996279414 | CORE 46 | Ti      | Ti           | 0.000 |  |  |
| Ti    | 3.570439936 | -0.507808534 | 23.440031462 | CORE 47 | Ti      | Ti           | 0.000 |  |  |
| Ti    | 0.987492137 | 0.532473024  | 25.848903698 | CORE 48 | Ti      | Ti           | 0.000 |  |  |
| Ti    | 0.858557851 | 1.348081969  | 16.155357234 | CORE 49 | Ti      | Ti           | 0.000 |  |  |
| Ti    | 2.075701601 | -0.179699243 | 18.558730956 | CORE 50 | Ti      | Ti           | 0.000 |  |  |
| Ti    | 4.659402195 | 1.052408441  | 20.981880905 | CORE 51 | Ti      | Ti           | 0.000 |  |  |
| Ti    | 1.999970679 | 2.267290406  | 23.429501051 | CORE 52 | Ti      | Ti           | 0.000 |  |  |
| Ti    | 4.650936123 | 4.134002842  | 16.128032296 | CORE 53 | Ti      | Ti           | 0.000 |  |  |
| Ti    | 4.545070744 | 3.297927920  | 25.821544359 | CORE 54 | Ti      | Ti           | 0.000 |  |  |
| Ti    | 4.073076409 | 2.945711874  | 1.513324031  | CORE 55 | Ti      | Ti           | 0.000 |  |  |
| Ti    | 1.269091132 | 0.205518263  | 1.603581291  | CORE 56 | Ti      | Ti           | 0.000 |  |  |
| Ti    | 3.446453266 | 0.057110249  | 13.750285973 | CORE 57 | Ti      | Ti           | 0.000 |  |  |
| Ti    | 2.011103133 | 2.853085598  | 13.691201449 | CORE 58 | Ti      | Ti           | 0.000 |  |  |
| Ti    | 3.372049953 | 3.376640793  | 8.899703889  | CORE 59 | Ti      | Ti           | 0.000 |  |  |
| Ti    | 0.763098192 | 4.362596689  | 11.306573999 | CORE 60 | Ti      | Ti           | 0.000 |  |  |
| Ti    | 1.899107375 | 0.570866260  | 8.869777414  | CORE 61 | Ti      | Ti           | 0.000 |  |  |
| Ti    | 4.552341608 | 1.562809114  | 11.254399126 | CORE 62 | Ti      | Ti           | 0.000 |  |  |
| Ti    | 3.895268485 | 1.097376648  | 3.903370140  | CORE 63 | Ti      | Ti           | 0.000 |  |  |
| Ti    | 1.302157206 | 3.889842428  | 3.946280045  | CORE 64 | Ti      | Ti           | 0.000 |  |  |
| Ti    | 4.327983902 | 5.196212877  | 6.402021410  | CORE 65 | Ti      | Ti           | 0.000 |  |  |
| Ti    | 0.899508990 | 2.417479004  | 6.417211969  | CORE 66 | Ti      | Ti           | 0.000 |  |  |
| end   |             |              |              |         |         |              |       |  |  |
| end   |             |              |              |         |         |              |       |  |  |
